# Supplementary material for: Neuroinflammatory inhibitors from Gardneria nutans Siebold & Zuccarini
Source: PubMed Central journal article supplement — RSC Adv. 2021 Aug 9;11(44):27085–91. doi: 10.1039/d1ra05204g (PMC9037802; doi:10.1039/d1ra05204g), 2021-08-09

**Supplementary Information for**

**Neuroinflammatory inhibitors from *Gardneria nutans* Siebold &**

**Zuccarini**

Ying-Ying Si,<sup>ab</sup> Wei-Wei Wang,<sup>a</sup> Qing-Mei Feng,<sup>a</sup> Zhen-Zhu Zhao,<sup>ab</sup> Gui-Min Xue,<sup>ab</sup> Yan-Jun Sun,<sup>ab</sup> Wei-Sheng Feng,<sup>ab</sup> Jun-Im Young\*<sup>c</sup> and Xian-Shi Wang\*<sup>acd</sup>

<sup>a</sup> College of Pharmacy, Henan University of Chinese Medicine, Zhengzhou 450046, China.

<sup>b</sup> The Engineering and Technology Center for Chinese Medicine Development of Henan Province, Zhengzhou 450046, China.

<sup>c</sup> College of Pharmacy, Chonnam National University, Gwangju 500-757 61186, South Korea.

<sup>d</sup> School of Pharmaceutical Sciences, Wenzhou Medical University, Wenzhou 325035, China.

**Corresponding Author**

\*Tel/fax: 15229331876. E-mail: [xianshifree@126.com](mailto:xianshifree@126.com) (X.-S. Wang)

\*Tel/fax: 062-530-2943. E-mail: [imyyoungjun@jnu.ac.kr](mailto:imyyoungjun@jnu.ac.kr) (J.-I. Young)

# Contents

## Supplementary Figures

|                                                                                                 |    |
|-------------------------------------------------------------------------------------------------|----|
| <b>Figure S1.</b> $^1\text{H}$ NMR spectrum of <b>1</b> (500 MHz, $\text{DMSO-}d_6$ ).....      | 1  |
| <b>Figure S2.</b> $^{13}\text{C}$ NMR spectrum of <b>1</b> (125 MHz, $\text{DMSO-}d_6$ ) .....  | 1  |
| <b>Figure S3.</b> HSQC spectrum of <b>1</b> ( $\text{DMSO-}d_6$ ) .....                         | 2  |
| <b>Figure S4.</b> HMBC spectrum of <b>1</b> ( $\text{DMSO-}d_6$ ) .....                         | 2  |
| <b>Figure S5.</b> NOESY spectrum of <b>1</b> ( $\text{DMSO-}d_6$ ).....                         | 3  |
| <b>Figure S6.</b> $^1\text{H-}^1\text{H}$ COSY spectrum of <b>1</b> ( $\text{DMSO-}d_6$ ).....  | 3  |
| <b>Figure S7.</b> HREIMS (+) report of <b>1</b> .....                                           | 4  |
| <b>Figure S8.</b> $^1\text{H}$ NMR spectrum of <b>2</b> (500 MHz, $\text{DMSO-}d_6$ ).....      | 4  |
| <b>Figure S9.</b> $^{13}\text{C}$ NMR spectrum of <b>2</b> (125 MHz, $\text{DMSO-}d_6$ ) .....  | 5  |
| <b>Figure S10.</b> HSQC spectrum of <b>2</b> ( $\text{DMSO-}d_6$ ) .....                        | 5  |
| <b>Figure S11.</b> HMBC spectrum of <b>2</b> ( $\text{DMSO-}d_6$ ) .....                        | 6  |
| <b>Figure S12.</b> NOESY spectrum of <b>2</b> ( $\text{DMSO-}d_6$ ).....                        | 6  |
| <b>Figure S13.</b> $^1\text{H-}^1\text{H}$ COSY spectrum of <b>2</b> ( $\text{DMSO-}d_6$ )..... | 7  |
| <b>Figure S14.</b> HREIMS (+) report of <b>2</b> .....                                          | 7  |
| <b>Figure S15.</b> $^1\text{H}$ NMR spectrum of <b>3</b> (500 MHz, $\text{DMSO-}d_6$ ).....     | 8  |
| <b>Figure S16.</b> $^{13}\text{C}$ NMR spectrum of <b>3</b> (125 MHz, $\text{DMSO-}d_6$ ) ..... | 8  |
| <b>Figure S17.</b> $^1\text{H}$ NMR spectrum of <b>4</b> (500 MHz, $\text{DMSO-}d_6$ ).....     | 9  |
| <b>Figure S18.</b> $^{13}\text{C}$ NMR spectrum of <b>4</b> (125 MHz, $\text{DMSO-}d_6$ ) ..... | 9  |
| <b>Figure S19.</b> $^1\text{H}$ NMR spectrum of <b>5</b> (500 MHz, $\text{DMSO-}d_6$ ).....     | 10 |
| <b>Figure S20.</b> $^{13}\text{C}$ NMR spectrum of <b>5</b> (125 MHz, $\text{DMSO-}d_6$ ) ..... | 10 |
| <b>Figure S21.</b> $^1\text{H}$ NMR spectrum of <b>6</b> (500 MHz, $\text{DMSO-}d_6$ ).....     | 11 |
| <b>Figure S22.</b> $^{13}\text{C}$ NMR spectrum of <b>6</b> (125 MHz, $\text{DMSO-}d_6$ ) ..... | 11 |
| <b>Figure S23.</b> HSQC spectrum of <b>6</b> ( $\text{DMSO-}d_6$ ) .....                        | 12 |
| <b>Figure S24.</b> HMBC spectrum of <b>6</b> ( $\text{DMSO-}d_6$ ) .....                        | 12 |
| <b>Figure S25.</b> NOESY spectrum of <b>6</b> ( $\text{DMSO-}d_6$ ).....                        | 13 |
| <b>Figure S26.</b> HREIMS (+) report of <b>6</b> .....                                          | 13 |
| <b>Figure S27.</b> $^1\text{H}$ NMR spectrum of <b>7</b> (500 MHz, $\text{DMSO-}d_6$ ).....     | 14 |
| <b>Figure S28.</b> $^{13}\text{C}$ NMR spectrum of <b>7</b> (125 MHz, $\text{DMSO-}d_6$ ) ..... | 14 |
| <b>Figure S29.</b> HSQC spectrum of <b>7</b> ( $\text{DMSO-}d_6$ ) .....                        | 15 |
| <b>Figure S30.</b> HMBC spectrum of <b>7</b> ( $\text{DMSO-}d_6$ ) .....                        | 15 |
| <b>Figure S31.</b> NOESY spectrum of <b>7</b> ( $\text{DMSO-}d_6$ ).....                        | 16 |
| <b>Figure S32.</b> HREIMS (+) report of <b>7</b> .....                                          | 16 |
| <b>Figure S33.</b> $^1\text{H}$ NMR spectrum of <b>8</b> (500 MHz, $\text{DMSO-}d_6$ ).....     | 17 |
| <b>Figure S34.</b> $^{13}\text{C}$ NMR spectrum of <b>8</b> (125 MHz, $\text{DMSO-}d_6$ ) ..... | 17 |
| <b>Figure S35.</b> $^1\text{H}$ NMR spectrum of <b>9</b> (500 MHz, $\text{DMSO-}d_6$ ).....     | 18 |
| <b>Figure S36.</b> $^{13}\text{C}$ NMR spectrum of <b>9</b> (125 MHz, $\text{DMSO-}d_6$ ) ..... | 18 |

**Figure S1.**  $^1\text{H}$  NMR spectrum of **1** (500 MHz,  $\text{DMSO-}d_6$ )

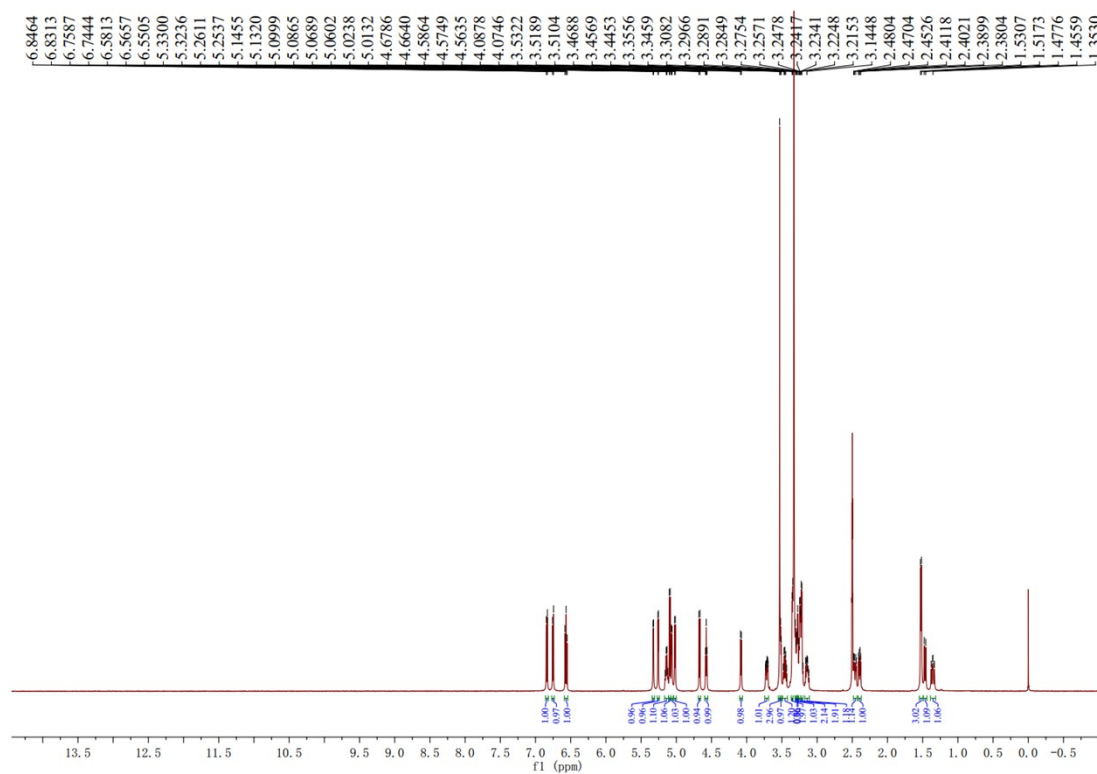

**Figure S2.**  $^{13}\text{C}$  NMR spectrum of **1** (125 MHz,  $\text{DMSO-}d_6$ )

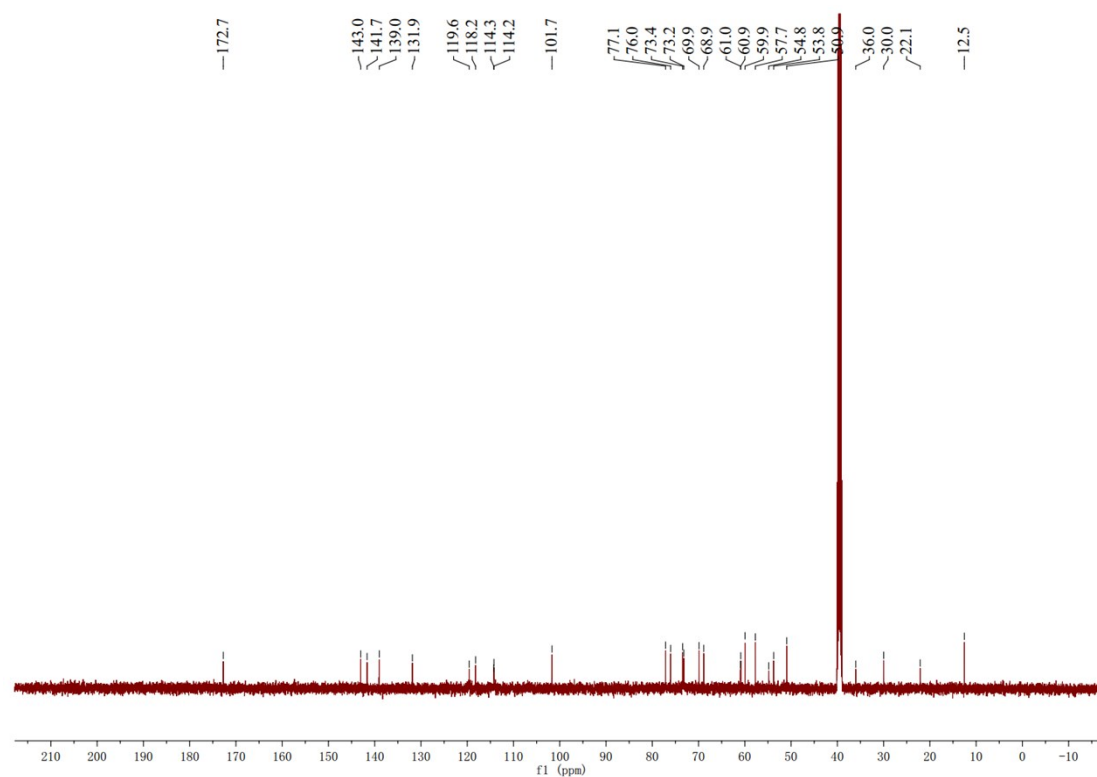

**Figure S3.** HSQC spectrum of **1** ( $\text{DMSO-}d_6$ )

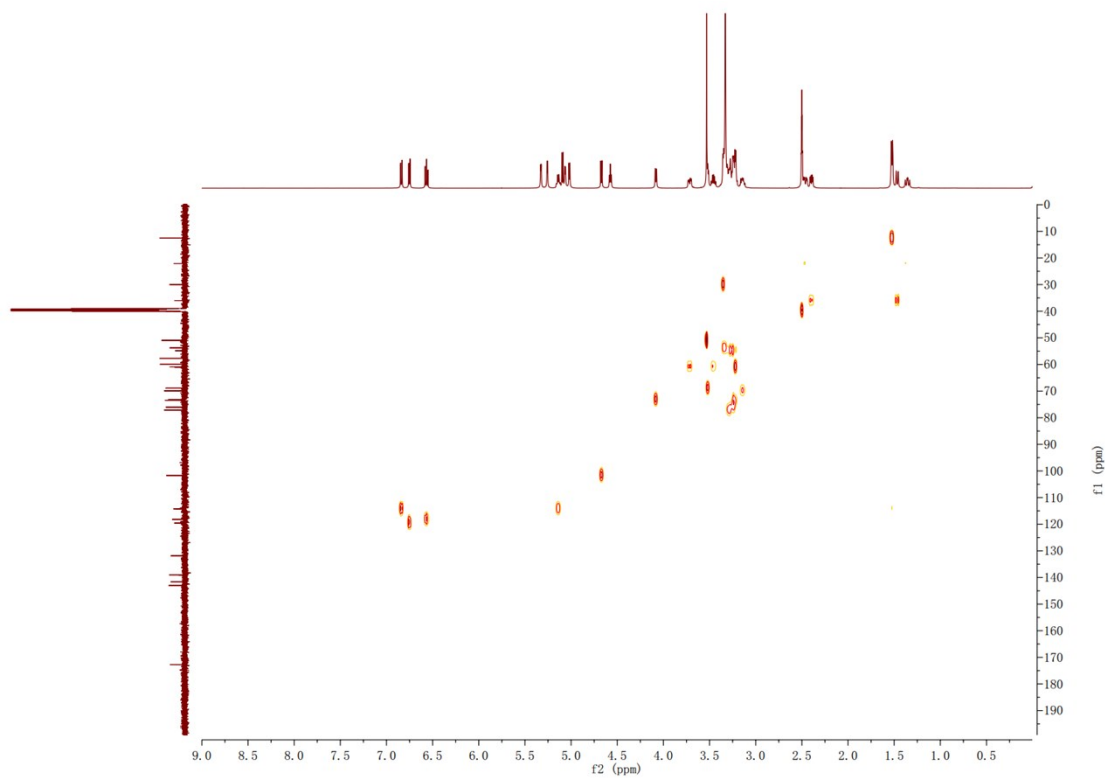

**Figure S4.** HMBC spectrum of **1** (DMSO- $d_6$ )

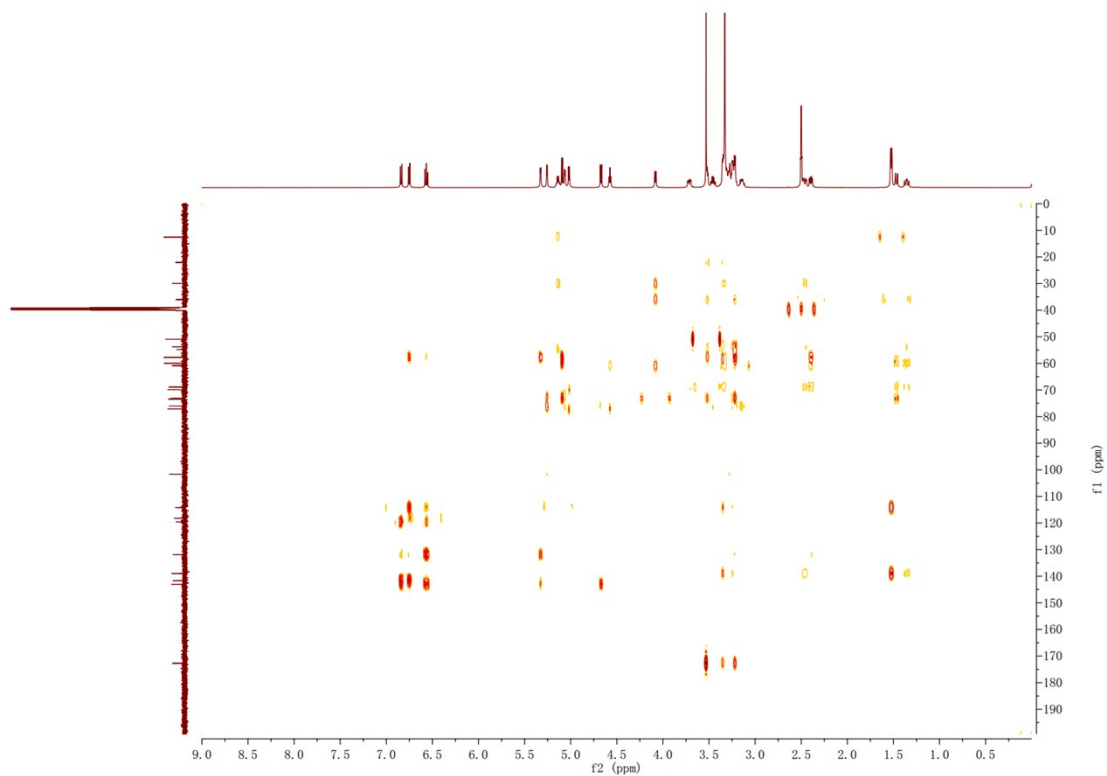

**Figure S5.** NOESY spectrum of **1** (DMSO- $d_6$ )

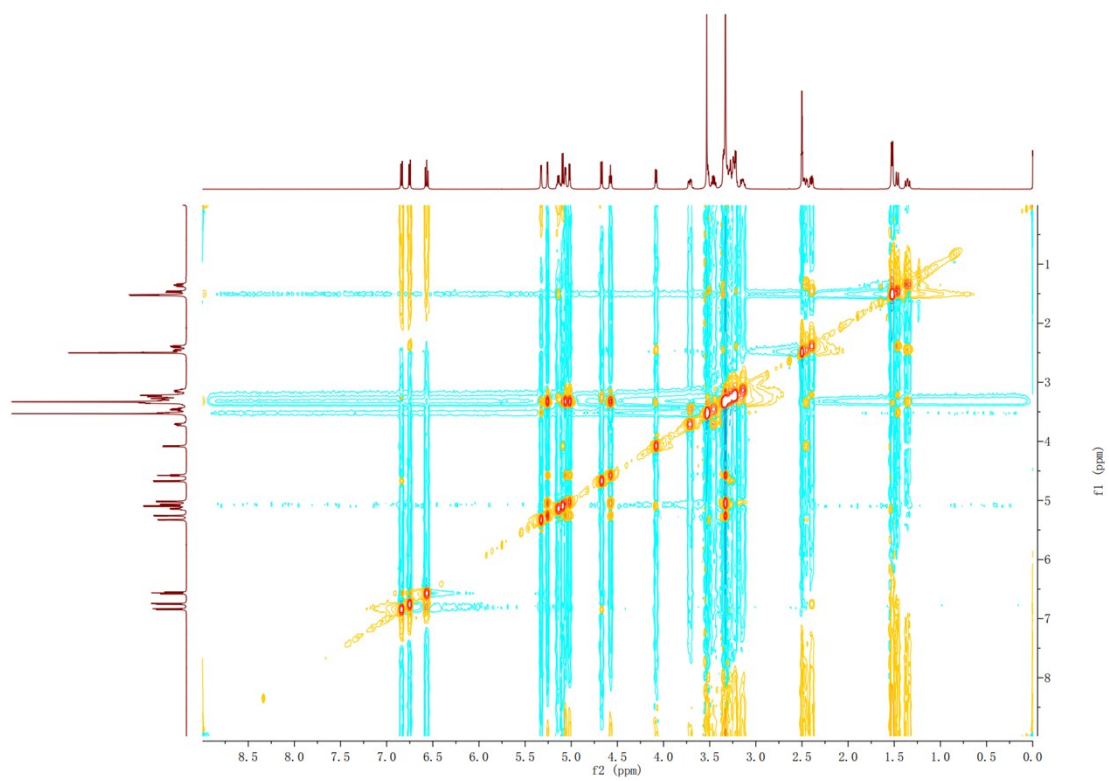

**Figure S6.**  $^1\text{H}$ - $^1\text{H}$  COSY spectrum of **1** ( $\text{DMSO-}d_6$ )

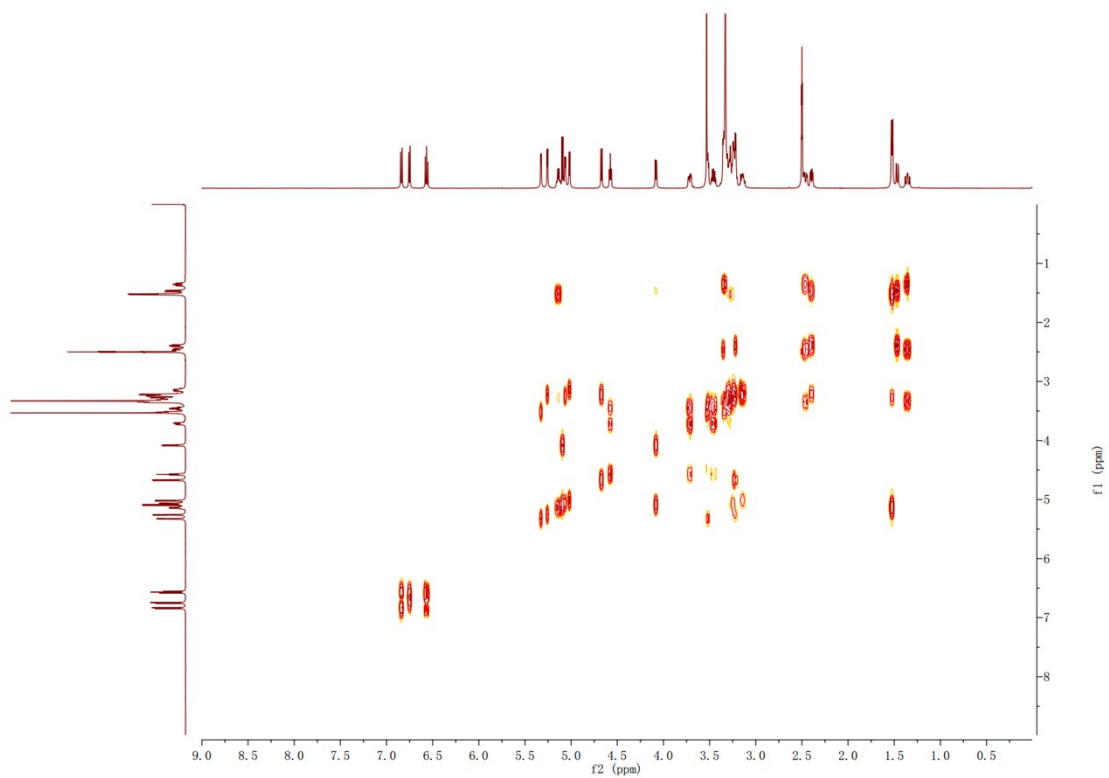

**Figure S7.** HREIMS (+) report of **1**

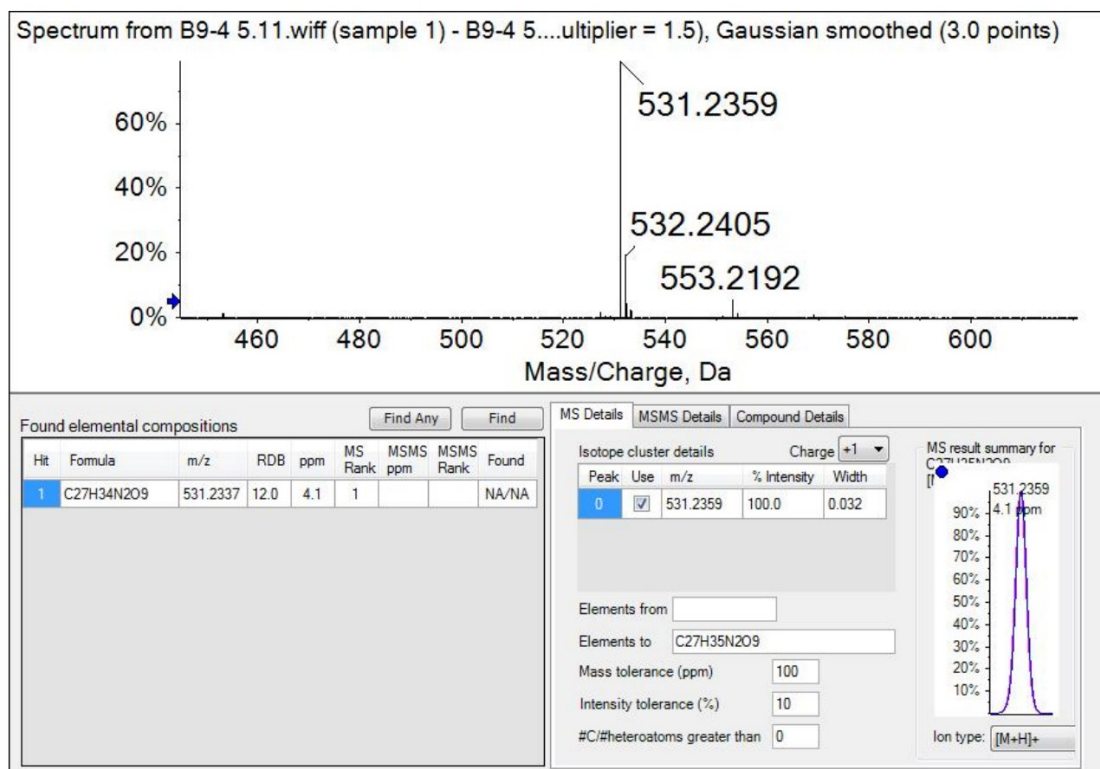

Figure S8. <sup>1</sup>H NMR spectrum of **2** (500 MHz, DMSO-*d*<sub>6</sub>)

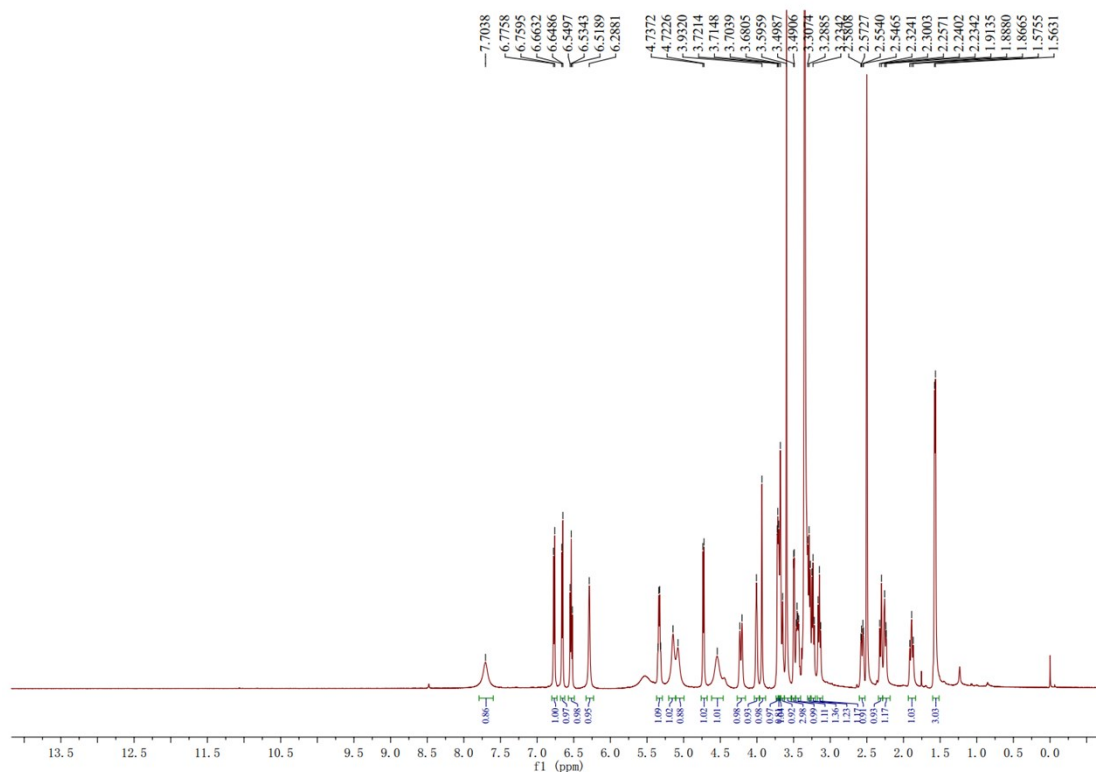

**Figure S9.**  $^{13}\text{C}$  NMR spectrum of **2** (125 MHz,  $\text{DMSO-}d_6$ )

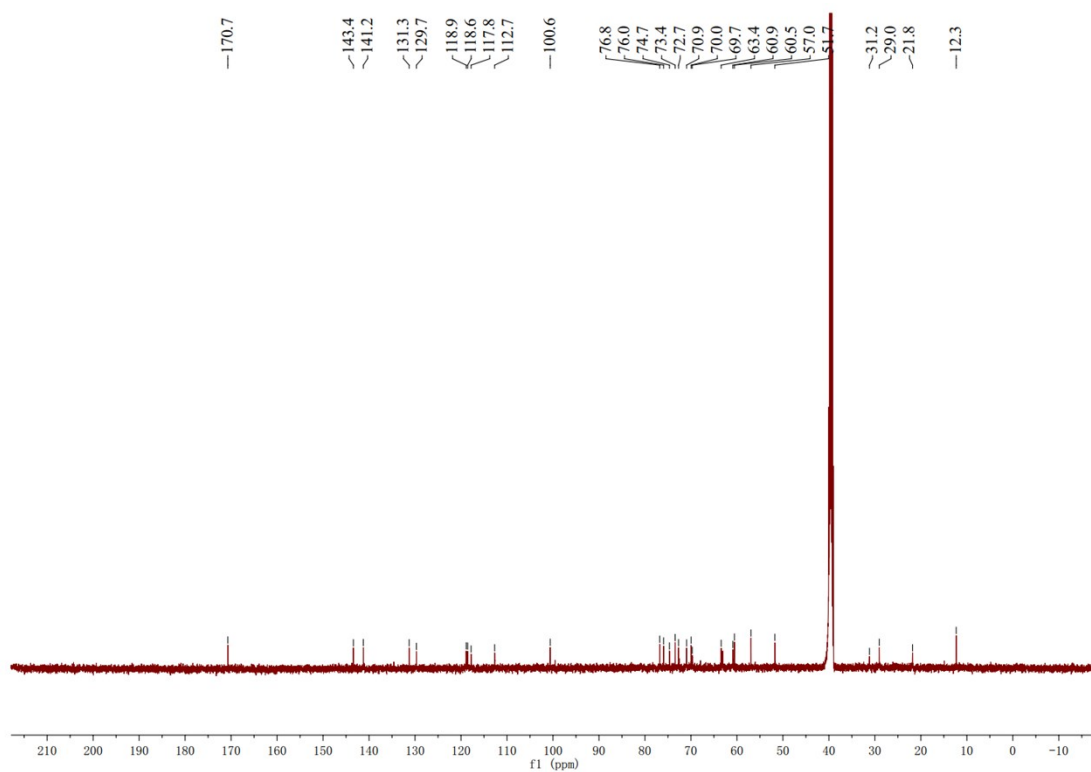

**Figure S10.** HSQC spectrum of **2** ( $\text{DMSO-}d_6$ )

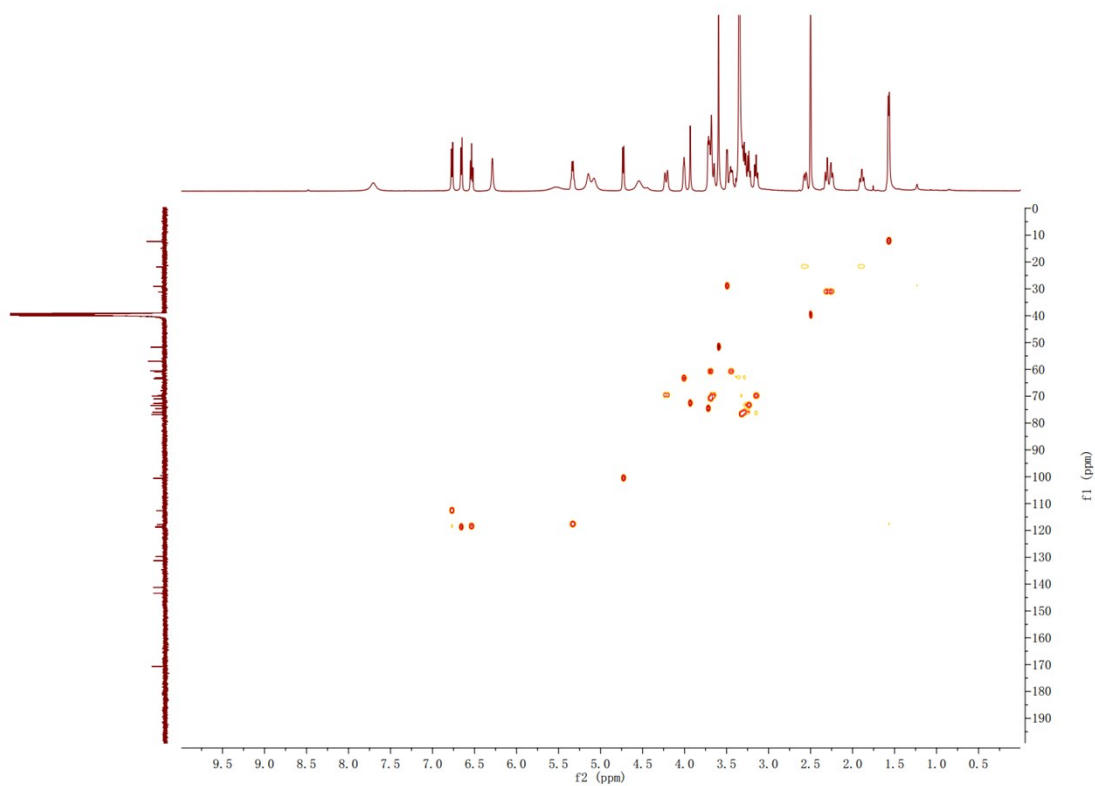

**Figure S11.** HMBC spectrum of **2** (DMSO- $d_6$ )

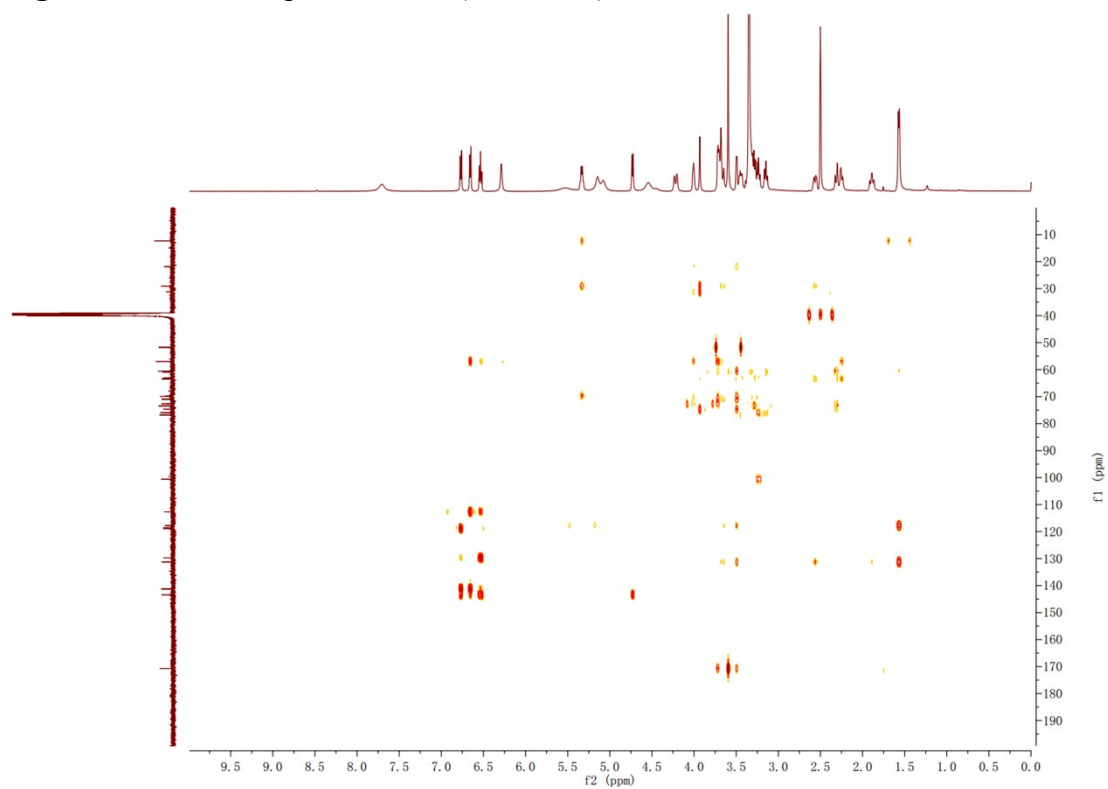

**Figure S12.** NOESY spectrum of **2** (DMSO- $d_6$ )

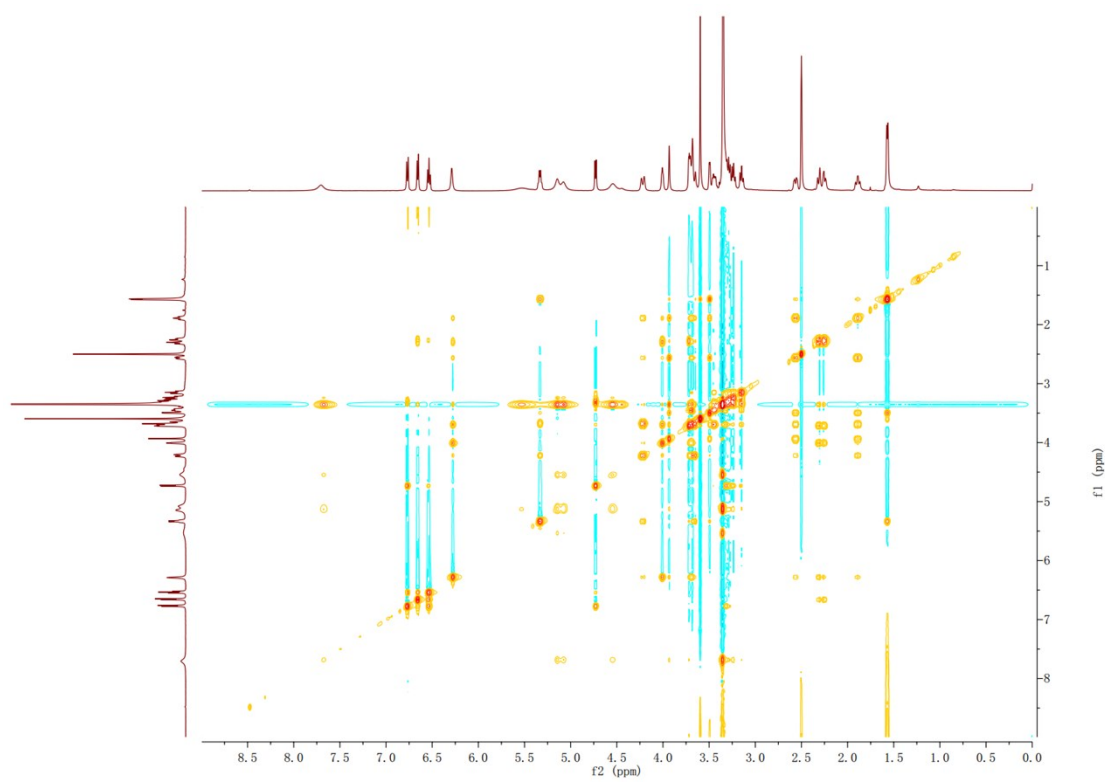



**Figure S13.**  $^1\text{H}$ - $^1\text{H}$  COSY spectrum of **2** (DMSO- $d_6$ )

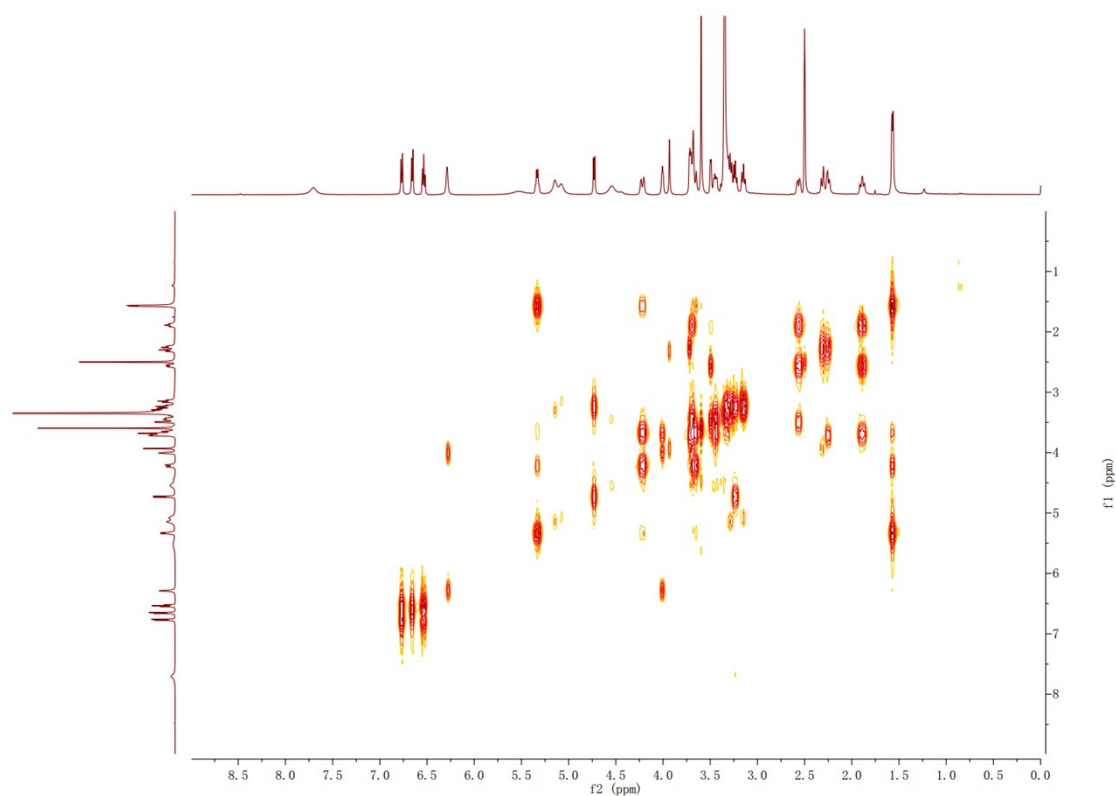

**Figure S14.** HREIMS (+) report of **2**

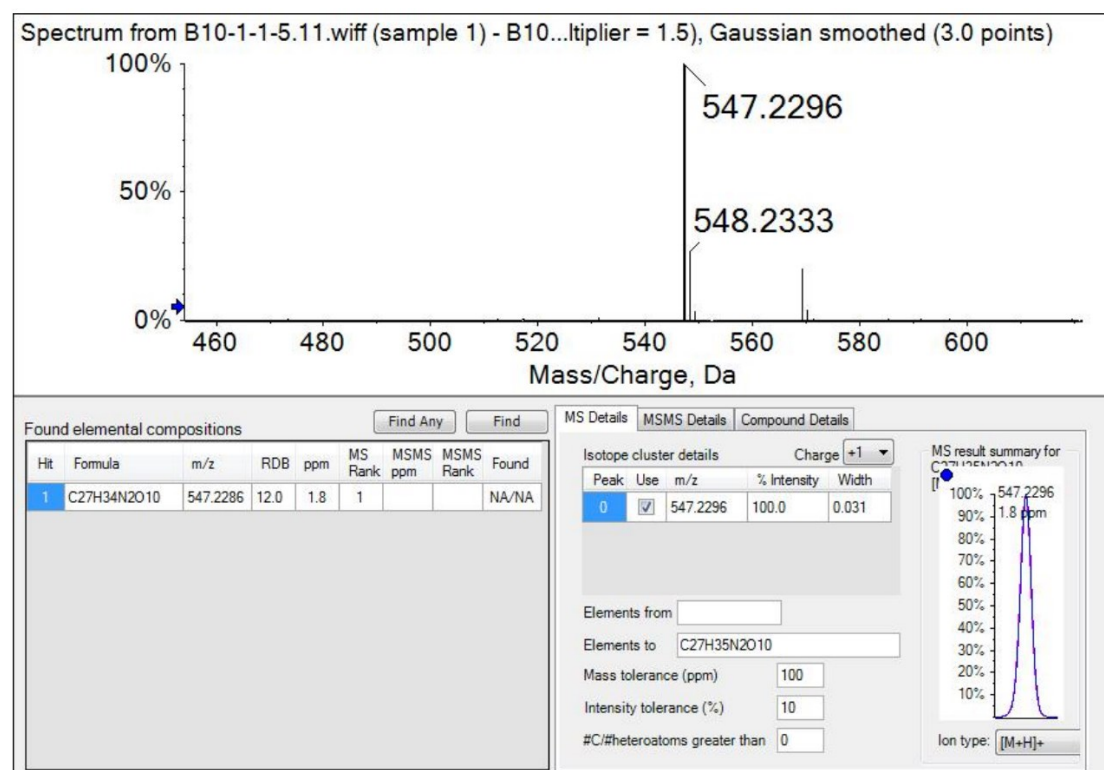

Figure S15.  $^1\text{H}$  NMR spectrum of **3** (500 MHz,  $\text{DMSO-}d_6$ )

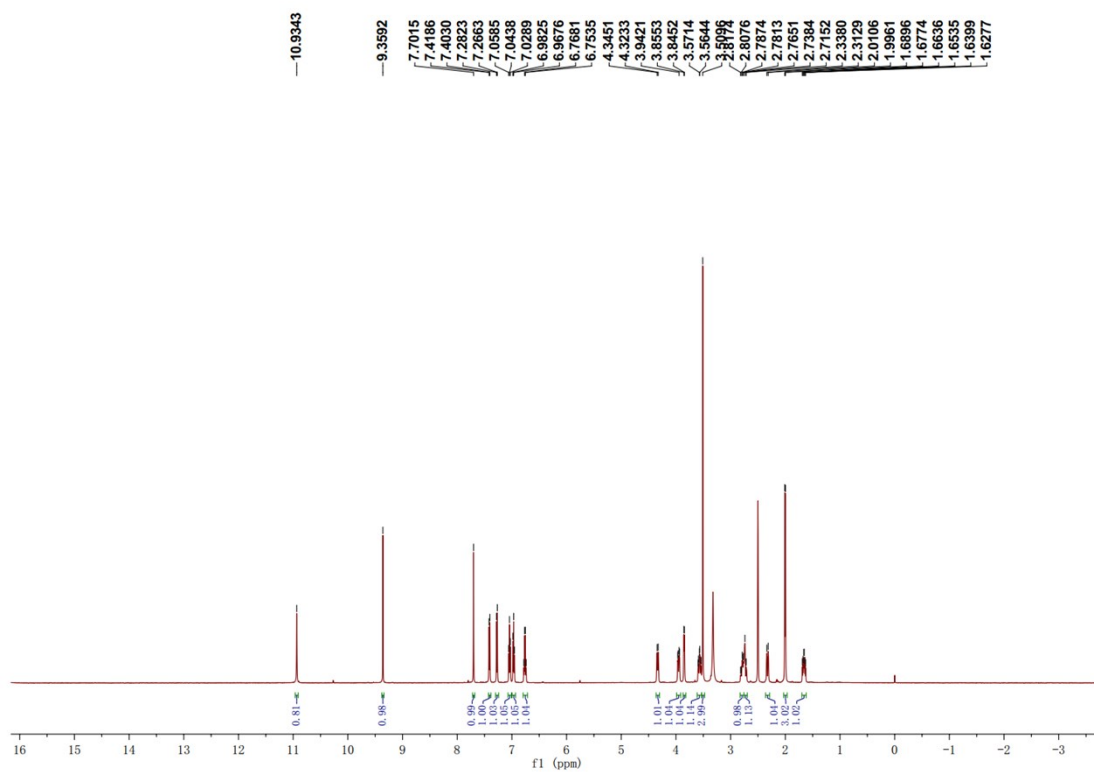

Figure S16.  $^{13}\text{C}$  NMR spectrum of **3** (125 MHz,  $\text{DMSO-}d_6$ )

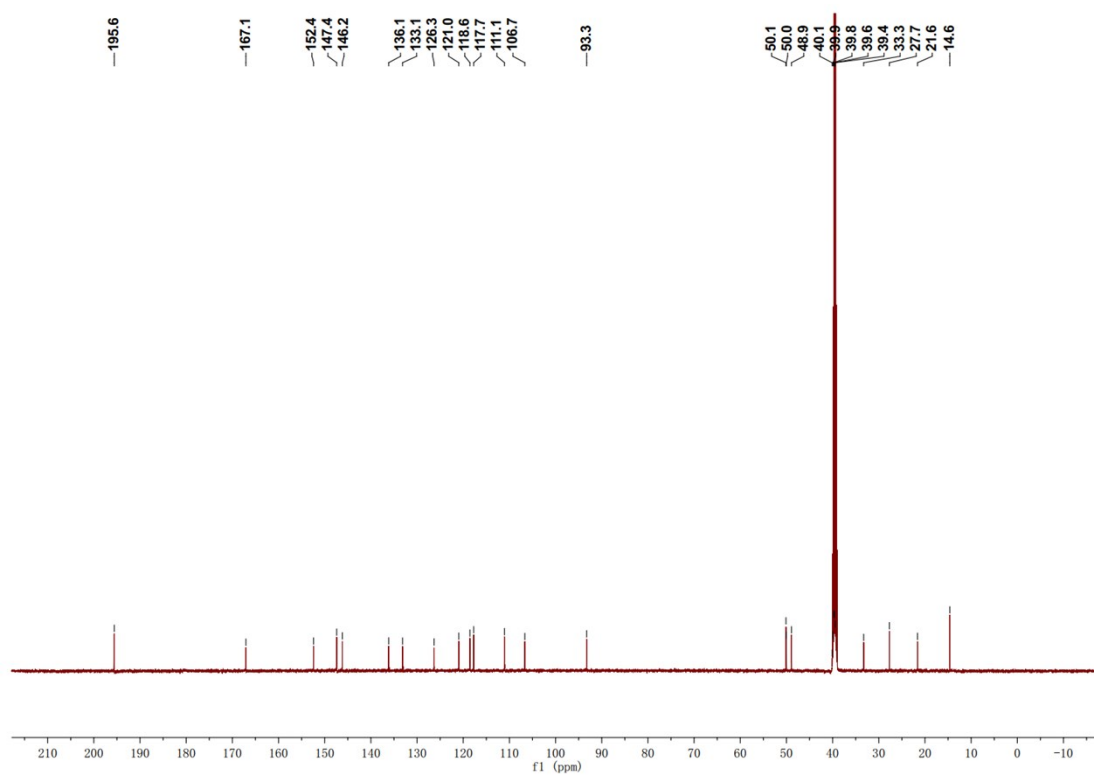

Figure S17. <sup>1</sup>H NMR spectrum of 4 (500 MHz, DMSO-*d*<sub>6</sub>)

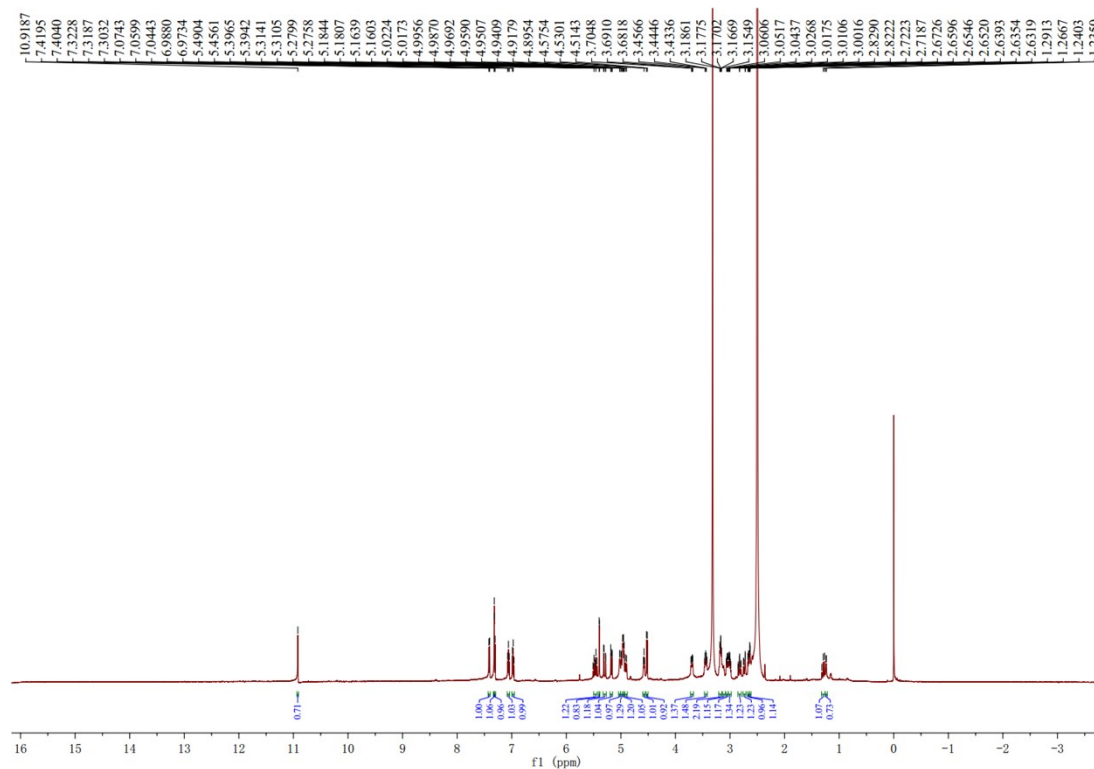

Figure S18. <sup>13</sup>C NMR spectrum of 4 (125 MHz, DMSO-*d*<sub>6</sub>)

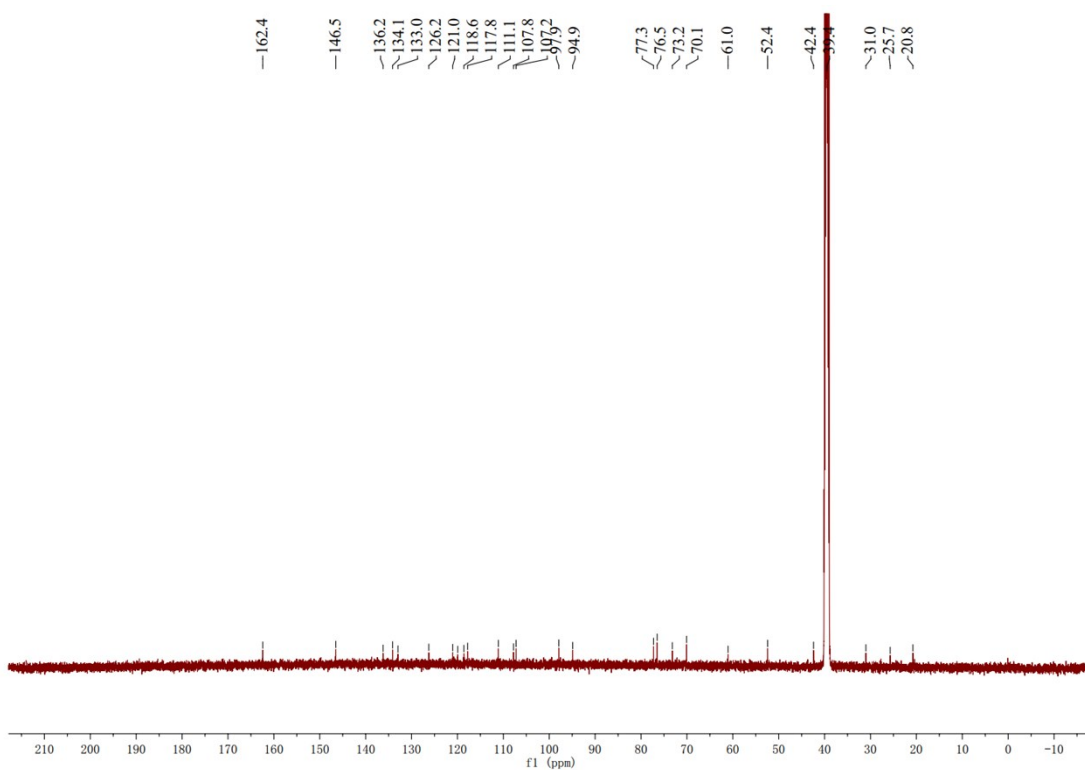

Figure S19.  $^1\text{H}$  NMR spectrum of **5** (500 MHz,  $\text{DMSO-}d_6$ )

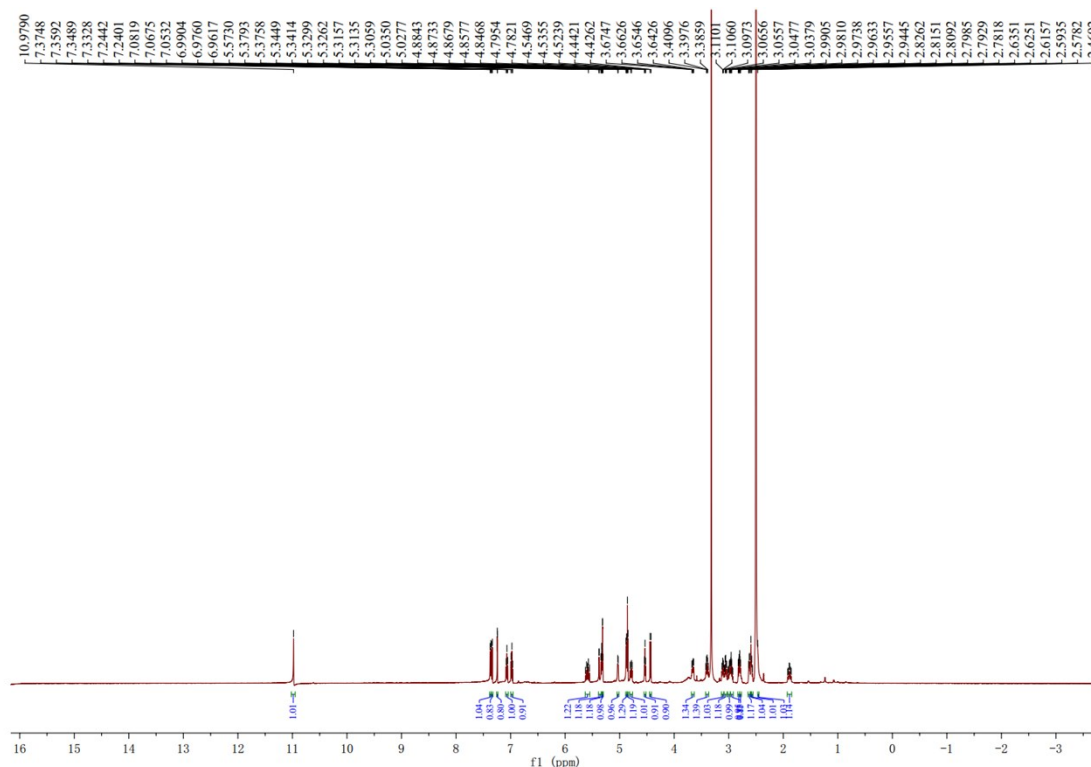

Figure S20.  $^{13}\text{C}$  NMR spectrum of **5** (125 MHz,  $\text{DMSO-}d_6$ )

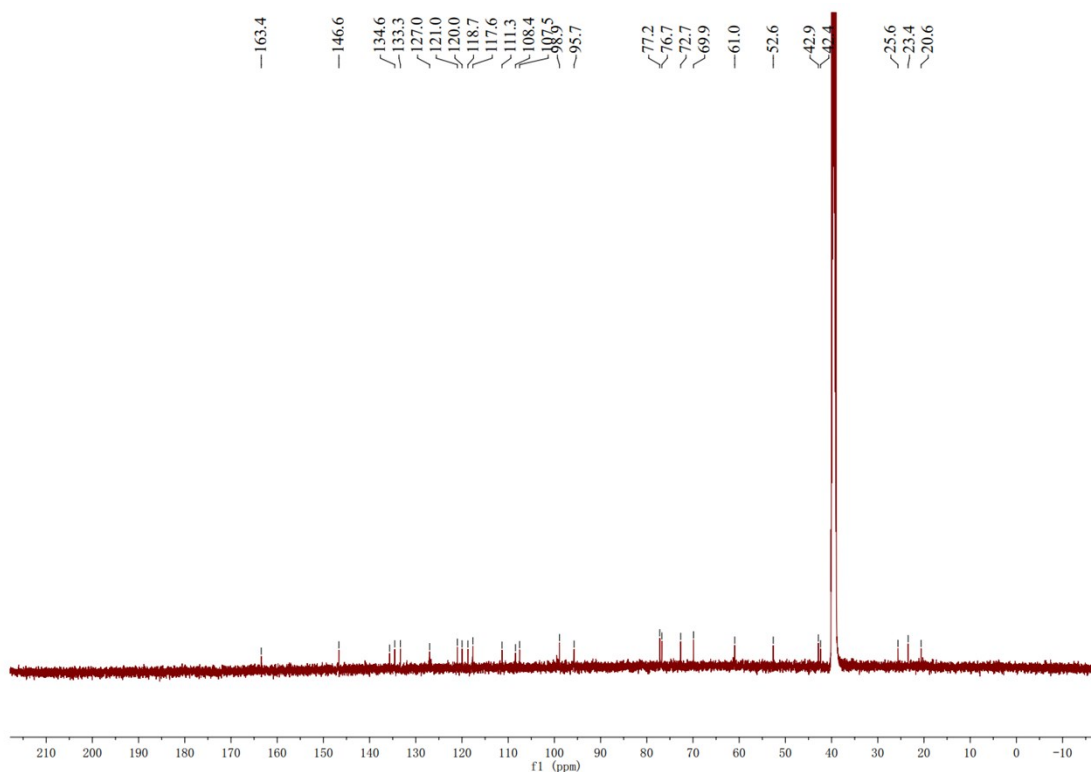

Figure S21.  $^1\text{H}$  NMR spectrum of **6** (500 MHz,  $\text{DMSO-}d_6$ )

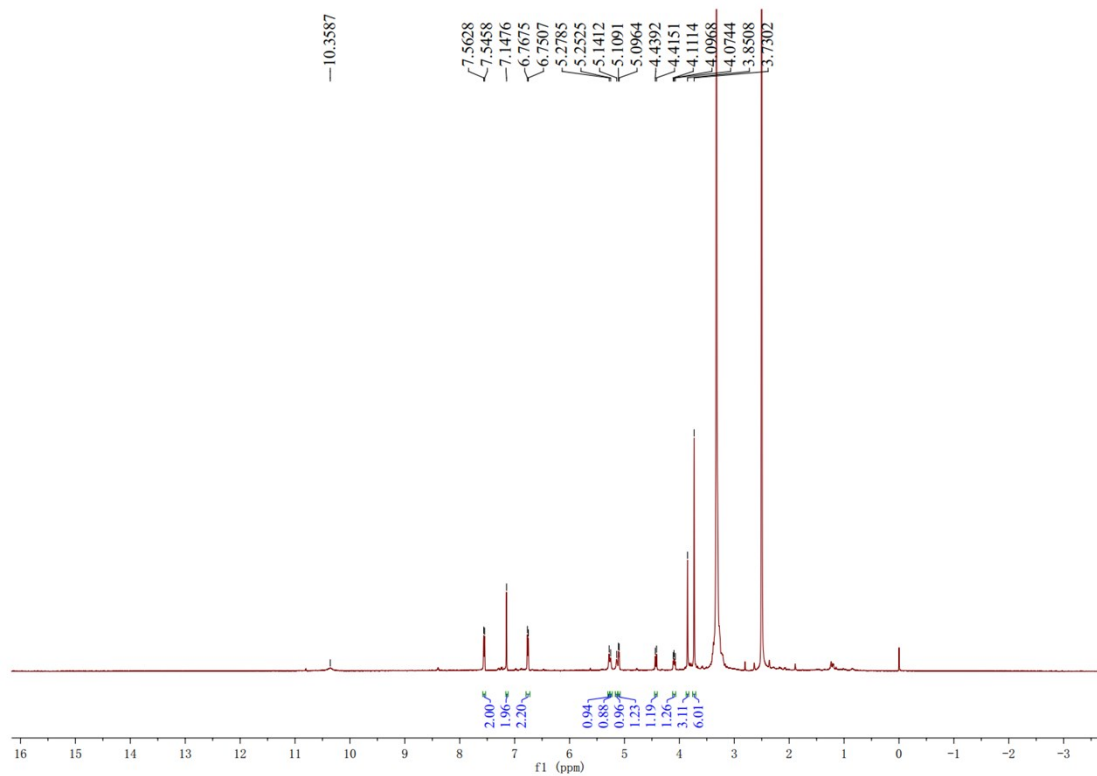

Figure S22.  $^{13}\text{C}$  NMR spectrum of **6** (125 MHz,  $\text{DMSO-}d_6$ )

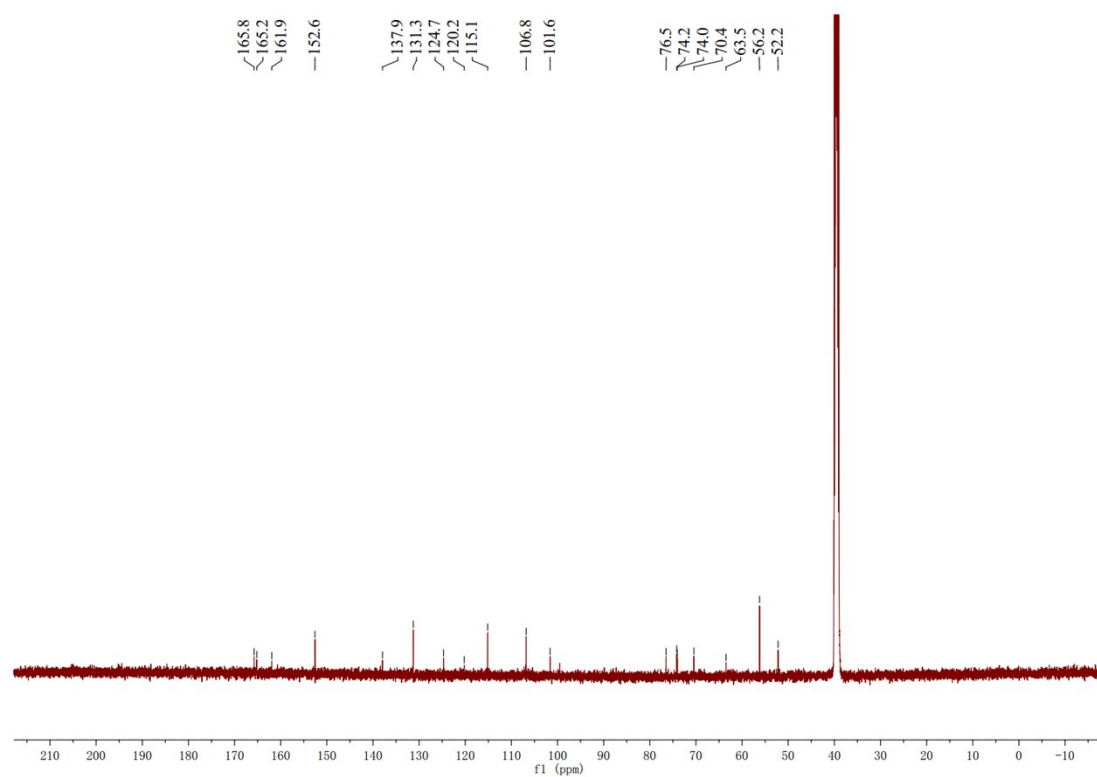

**Figure S23.** HSQC spectrum of **6** (DMSO- $d_6$ )

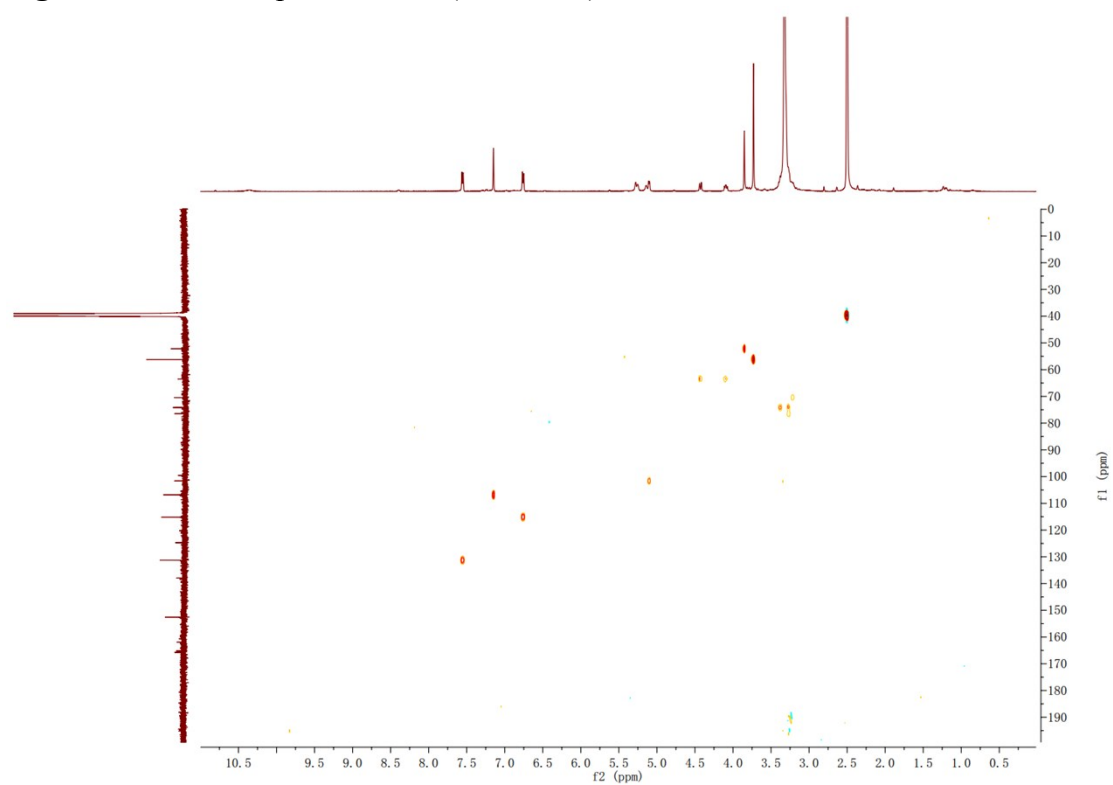

**Figure S24.** HMBC spectrum of **6** (DMSO- $d_6$ )

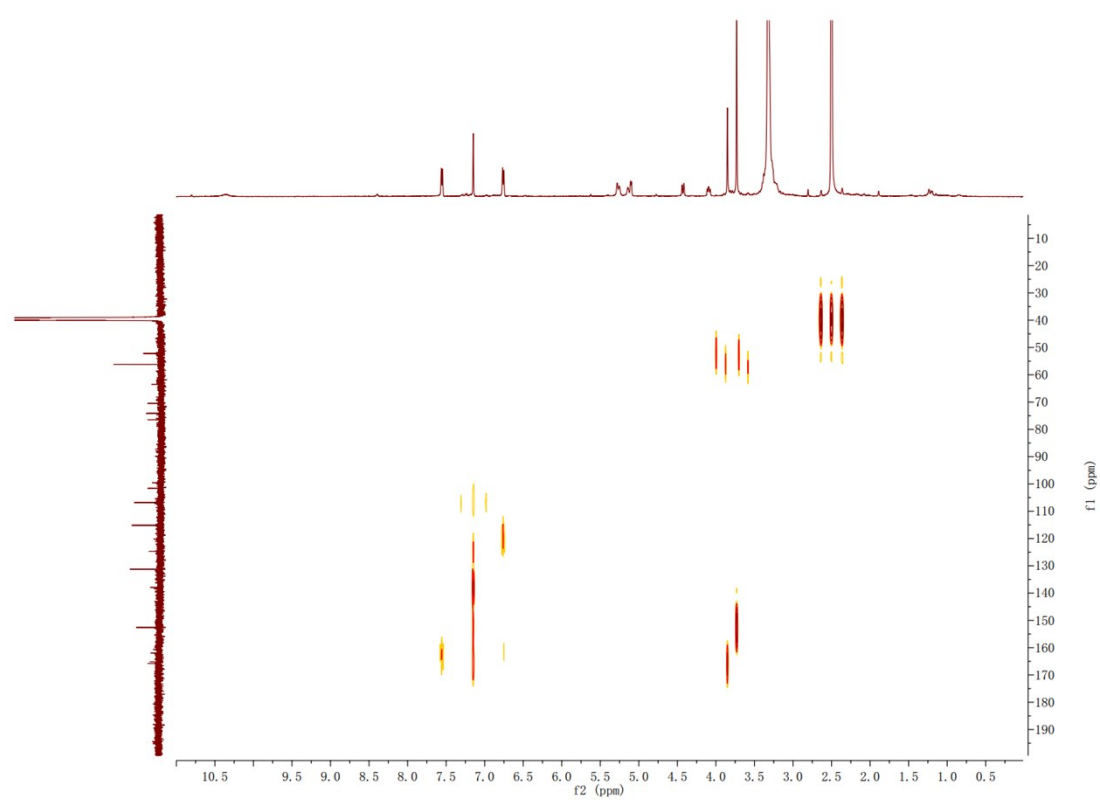

**Figure S25.** NOESY spectrum of **6** (DMSO- $d_6$ )

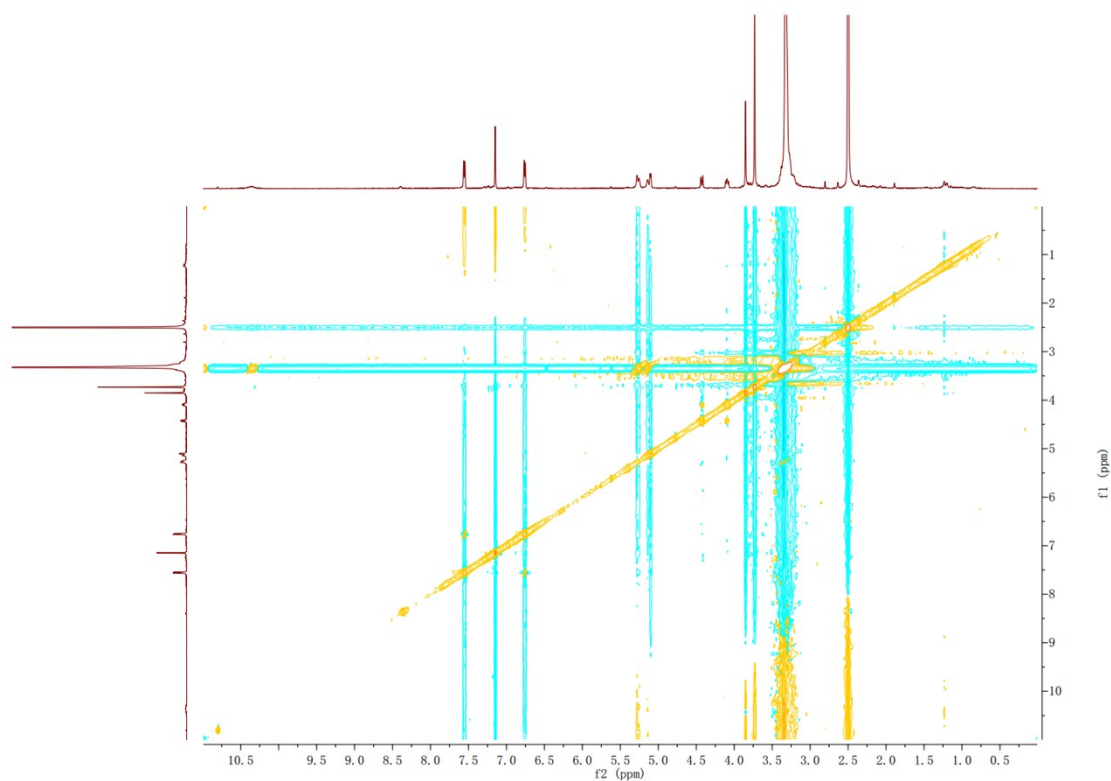

**Figure S26.** HREIMS (+) report of **6**

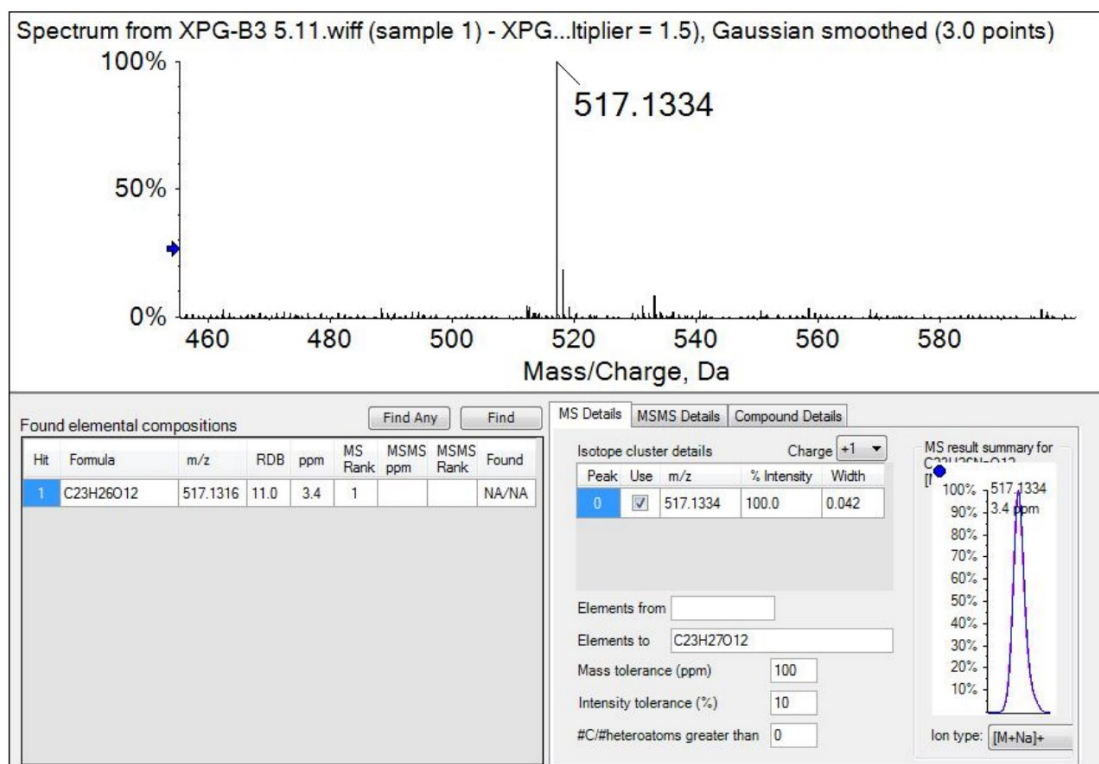

Figure S27. <sup>1</sup>H NMR spectrum of **7** (500 MHz, DMSO-*d*<sub>6</sub>)

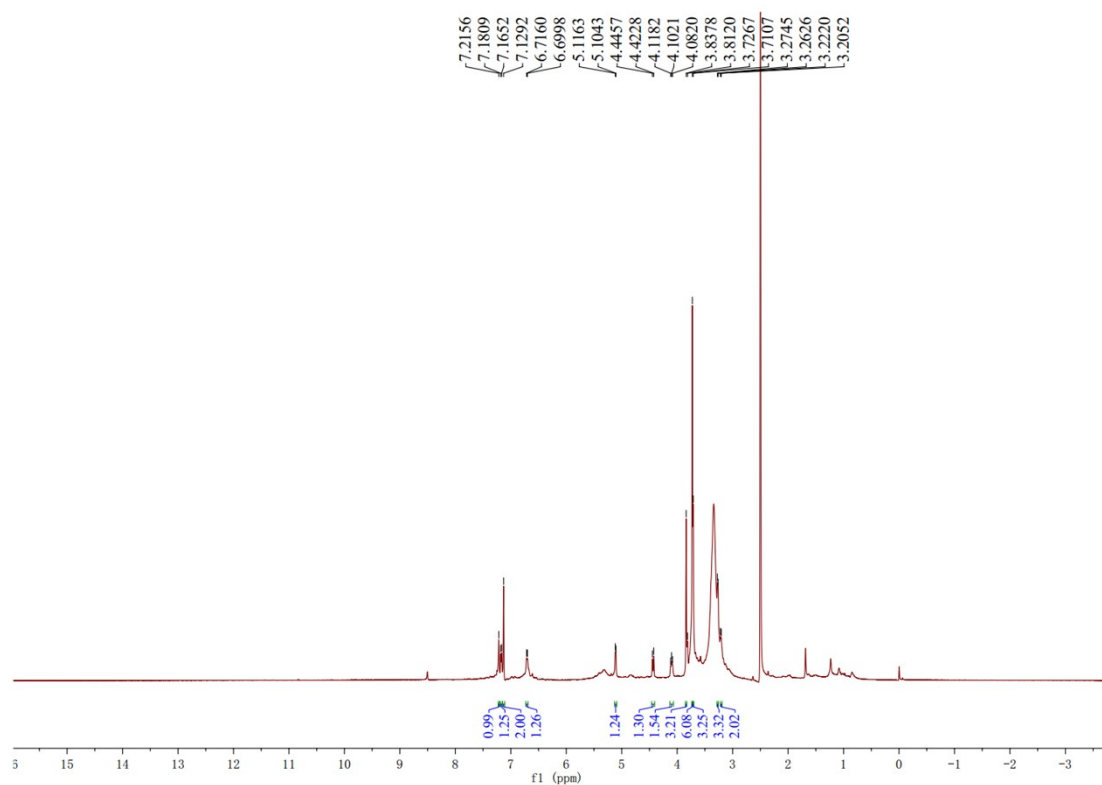

Figure S28. <sup>13</sup>C NMR spectrum of **7** (125 MHz, DMSO-*d*<sub>6</sub>)

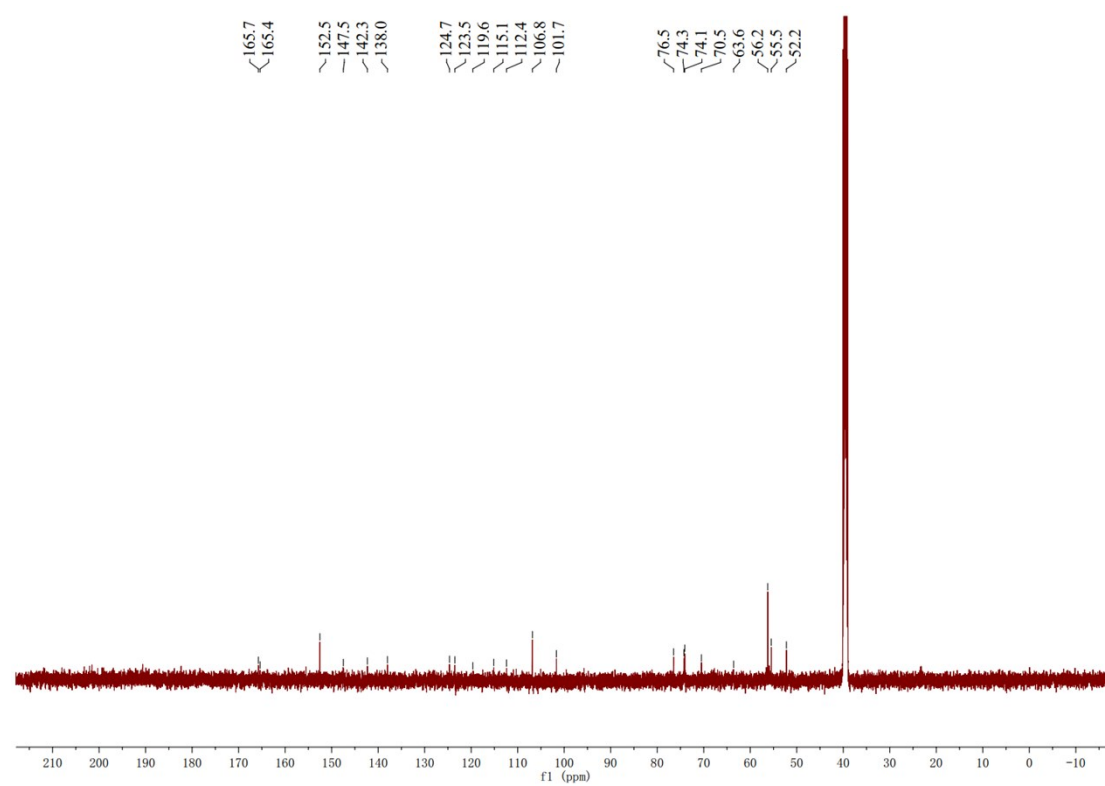



Figure S29. HSQC spectrum of **7** (DMSO-*d*<sub>6</sub>)

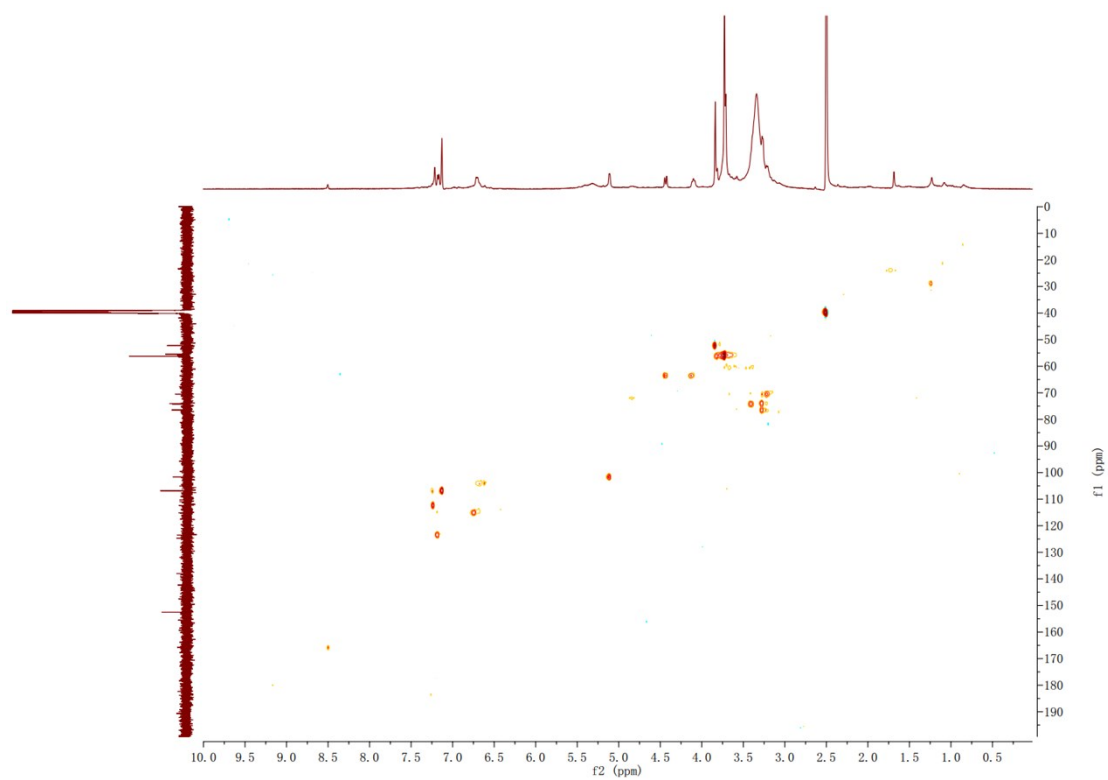

Figure S30. HMBC spectrum of **7** (DMSO-*d*<sub>6</sub>)

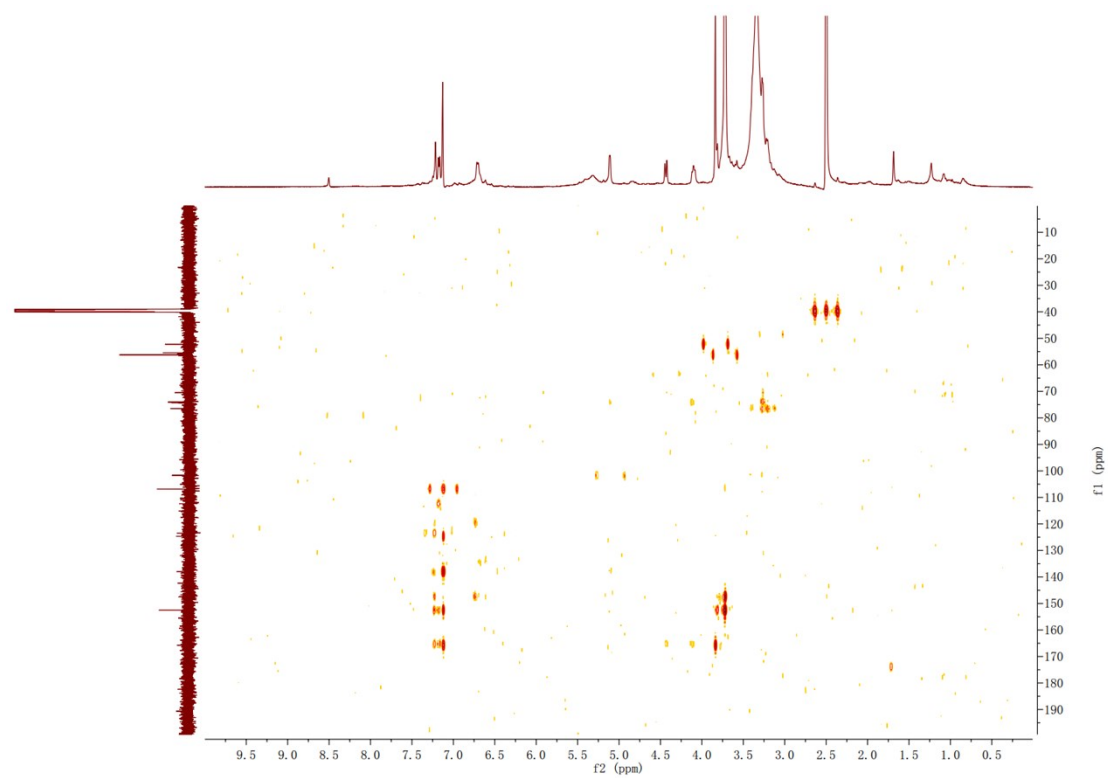

**Figure S31.** NOESY spectrum of **7** (DMSO-*d*<sub>6</sub>)

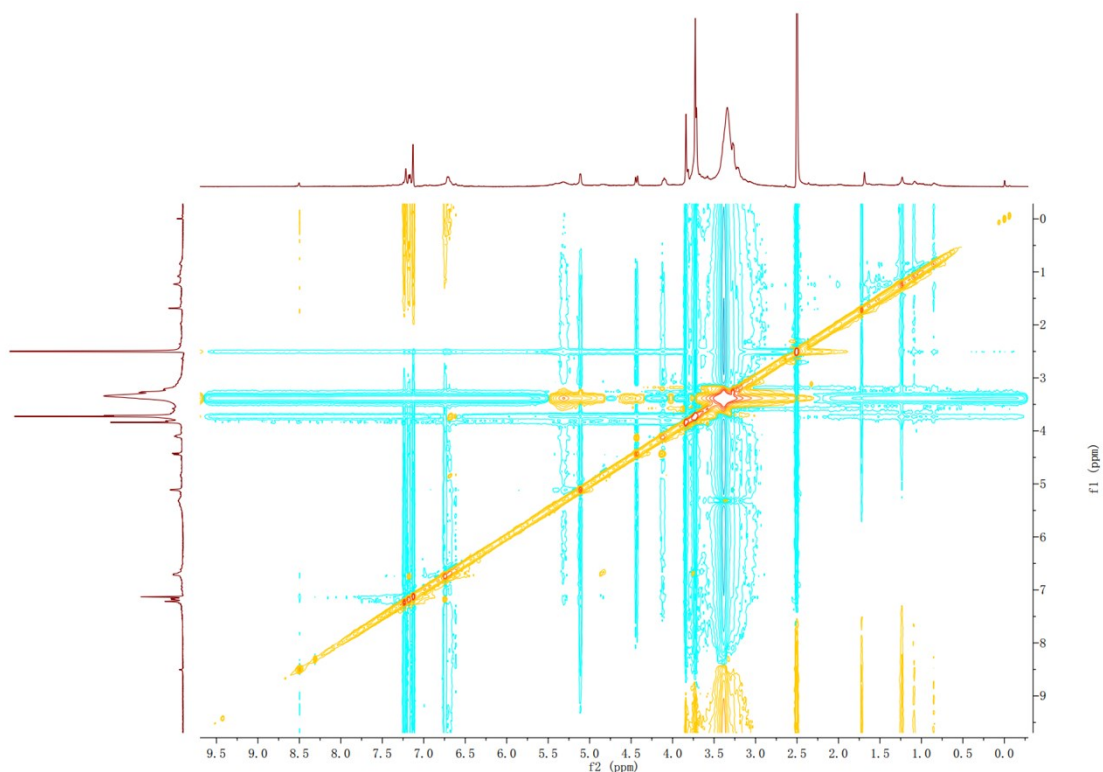

**Figure S32.** HREIMS (+) report of **7**

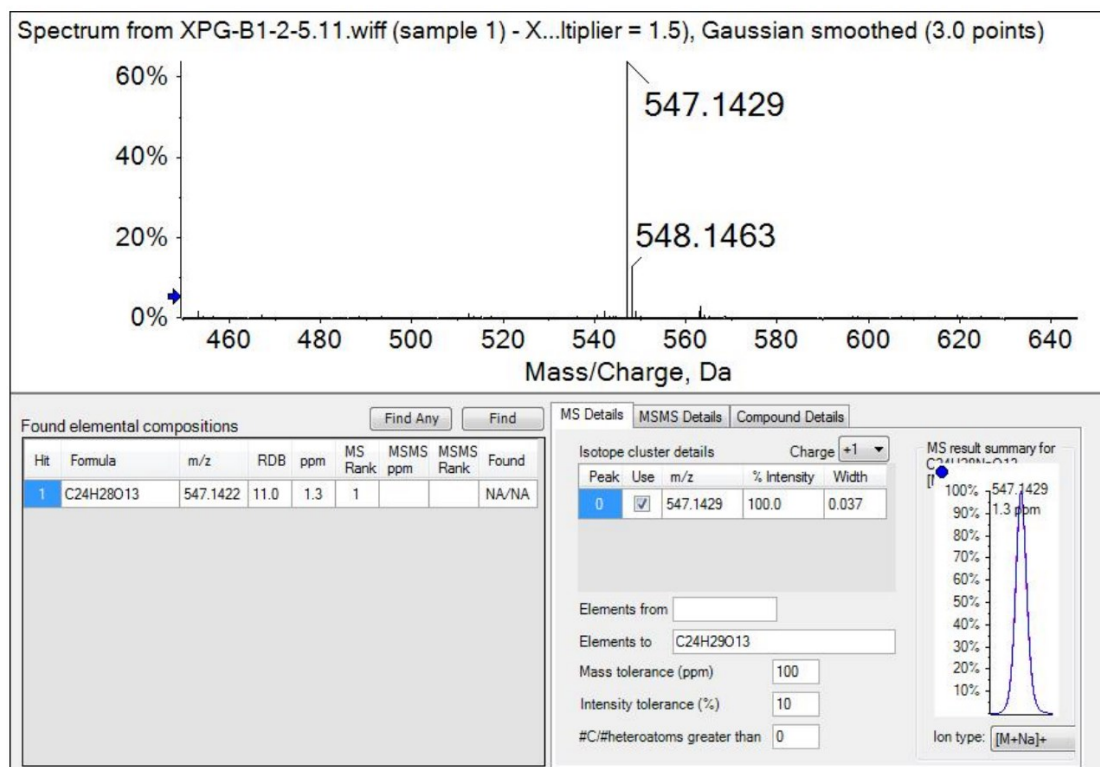

Figure S33.  $^1\text{H}$  NMR spectrum of **8** (500 MHz,  $\text{DMSO-}d_6$ )

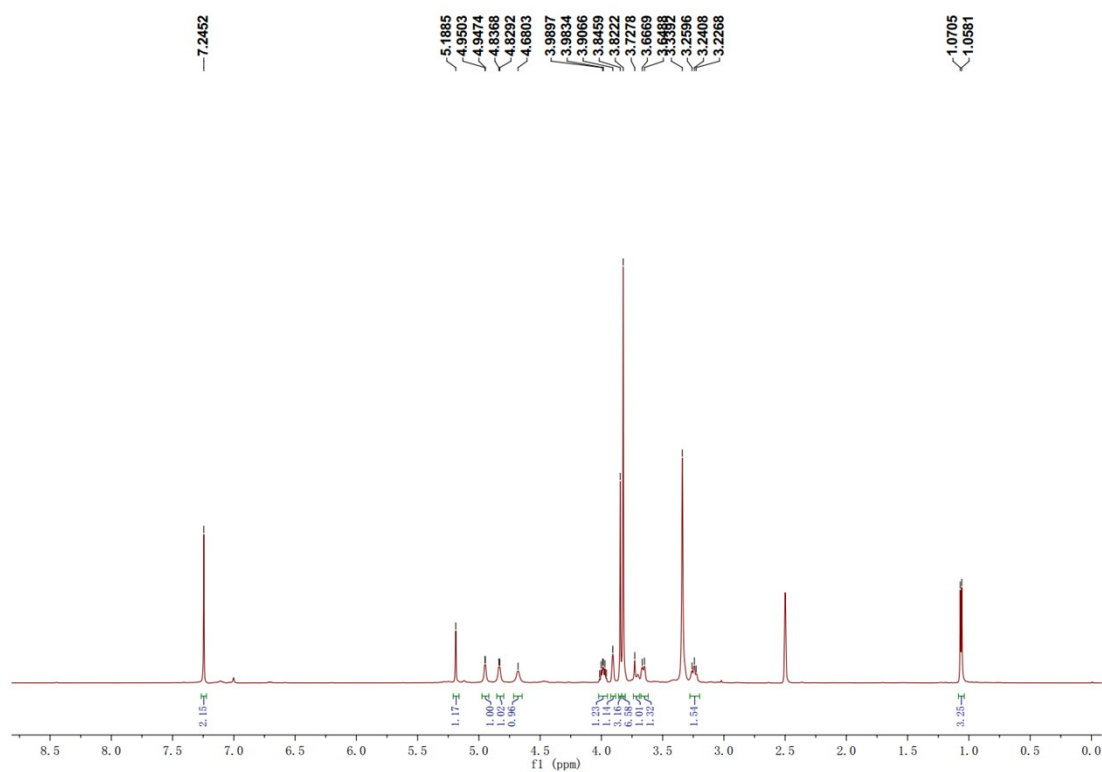

Figure S34.  $^{13}\text{C}$  NMR spectrum of **8** (125 MHz,  $\text{DMSO-}d_6$ )

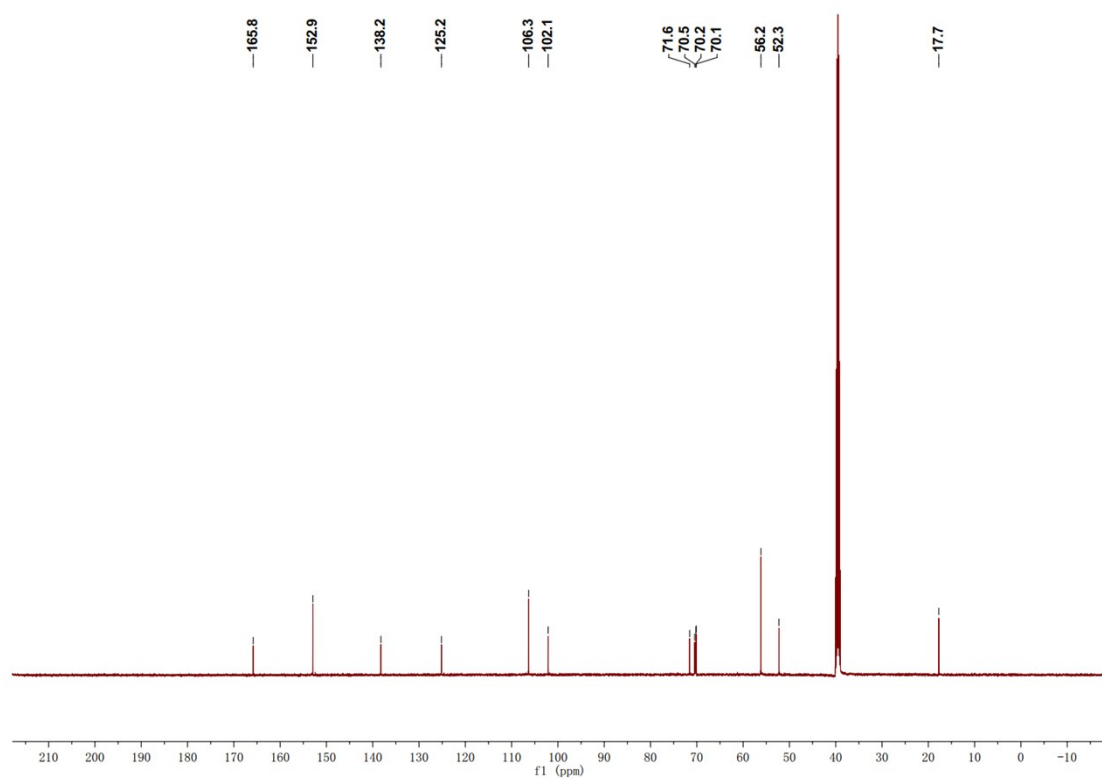

Figure S35.  $^1\text{H}$  NMR spectrum of **9** (500 MHz,  $\text{DMSO-}d_6$ )

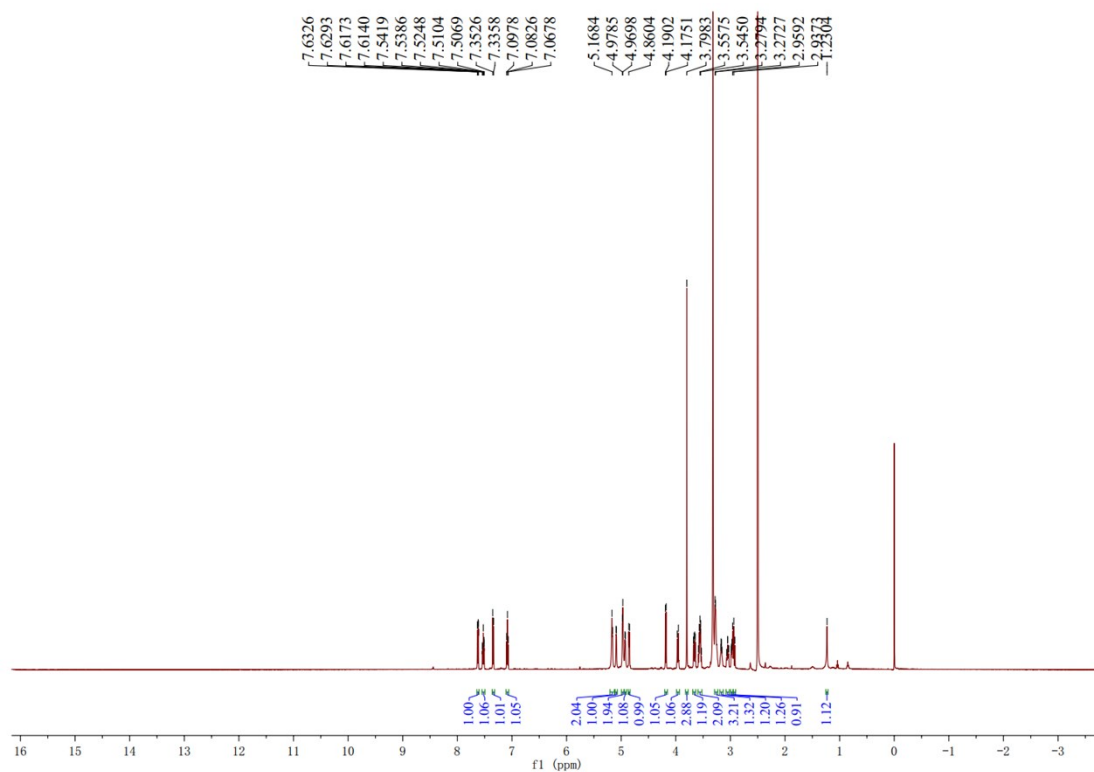

Figure S36.  $^{13}\text{C}$  NMR spectrum of **9** (125 MHz,  $\text{DMSO-}d_6$ )

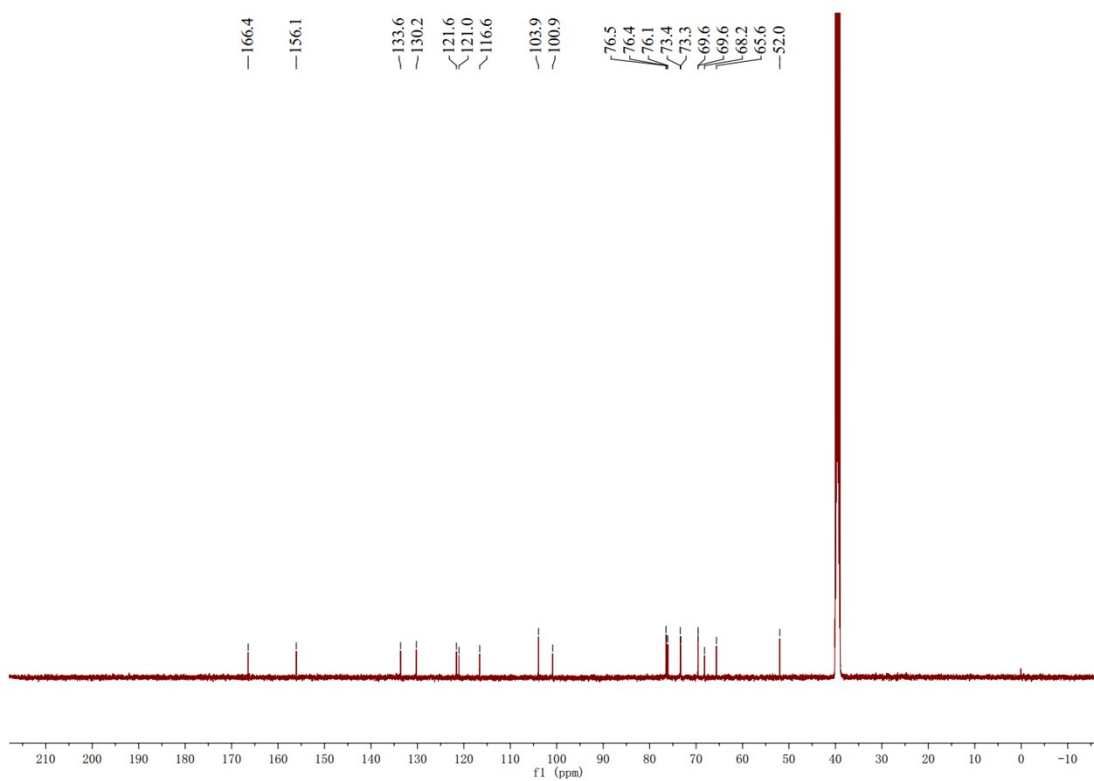

Supplement: RA-011-D1RA05204G-s001.pdf [file RA-011-D1RA05204G-s001.pdf]
